# Supplementary material for: PSDX: A Comprehensive Multi-Omics Association Database of Populus trichocarpa With a Focus on the Secondary Growth in Response to Stresses
Source: PubMed Central journal article supplement (PMC8195342; doi:10.3389/fpls.2021.655565), 2021-05-20

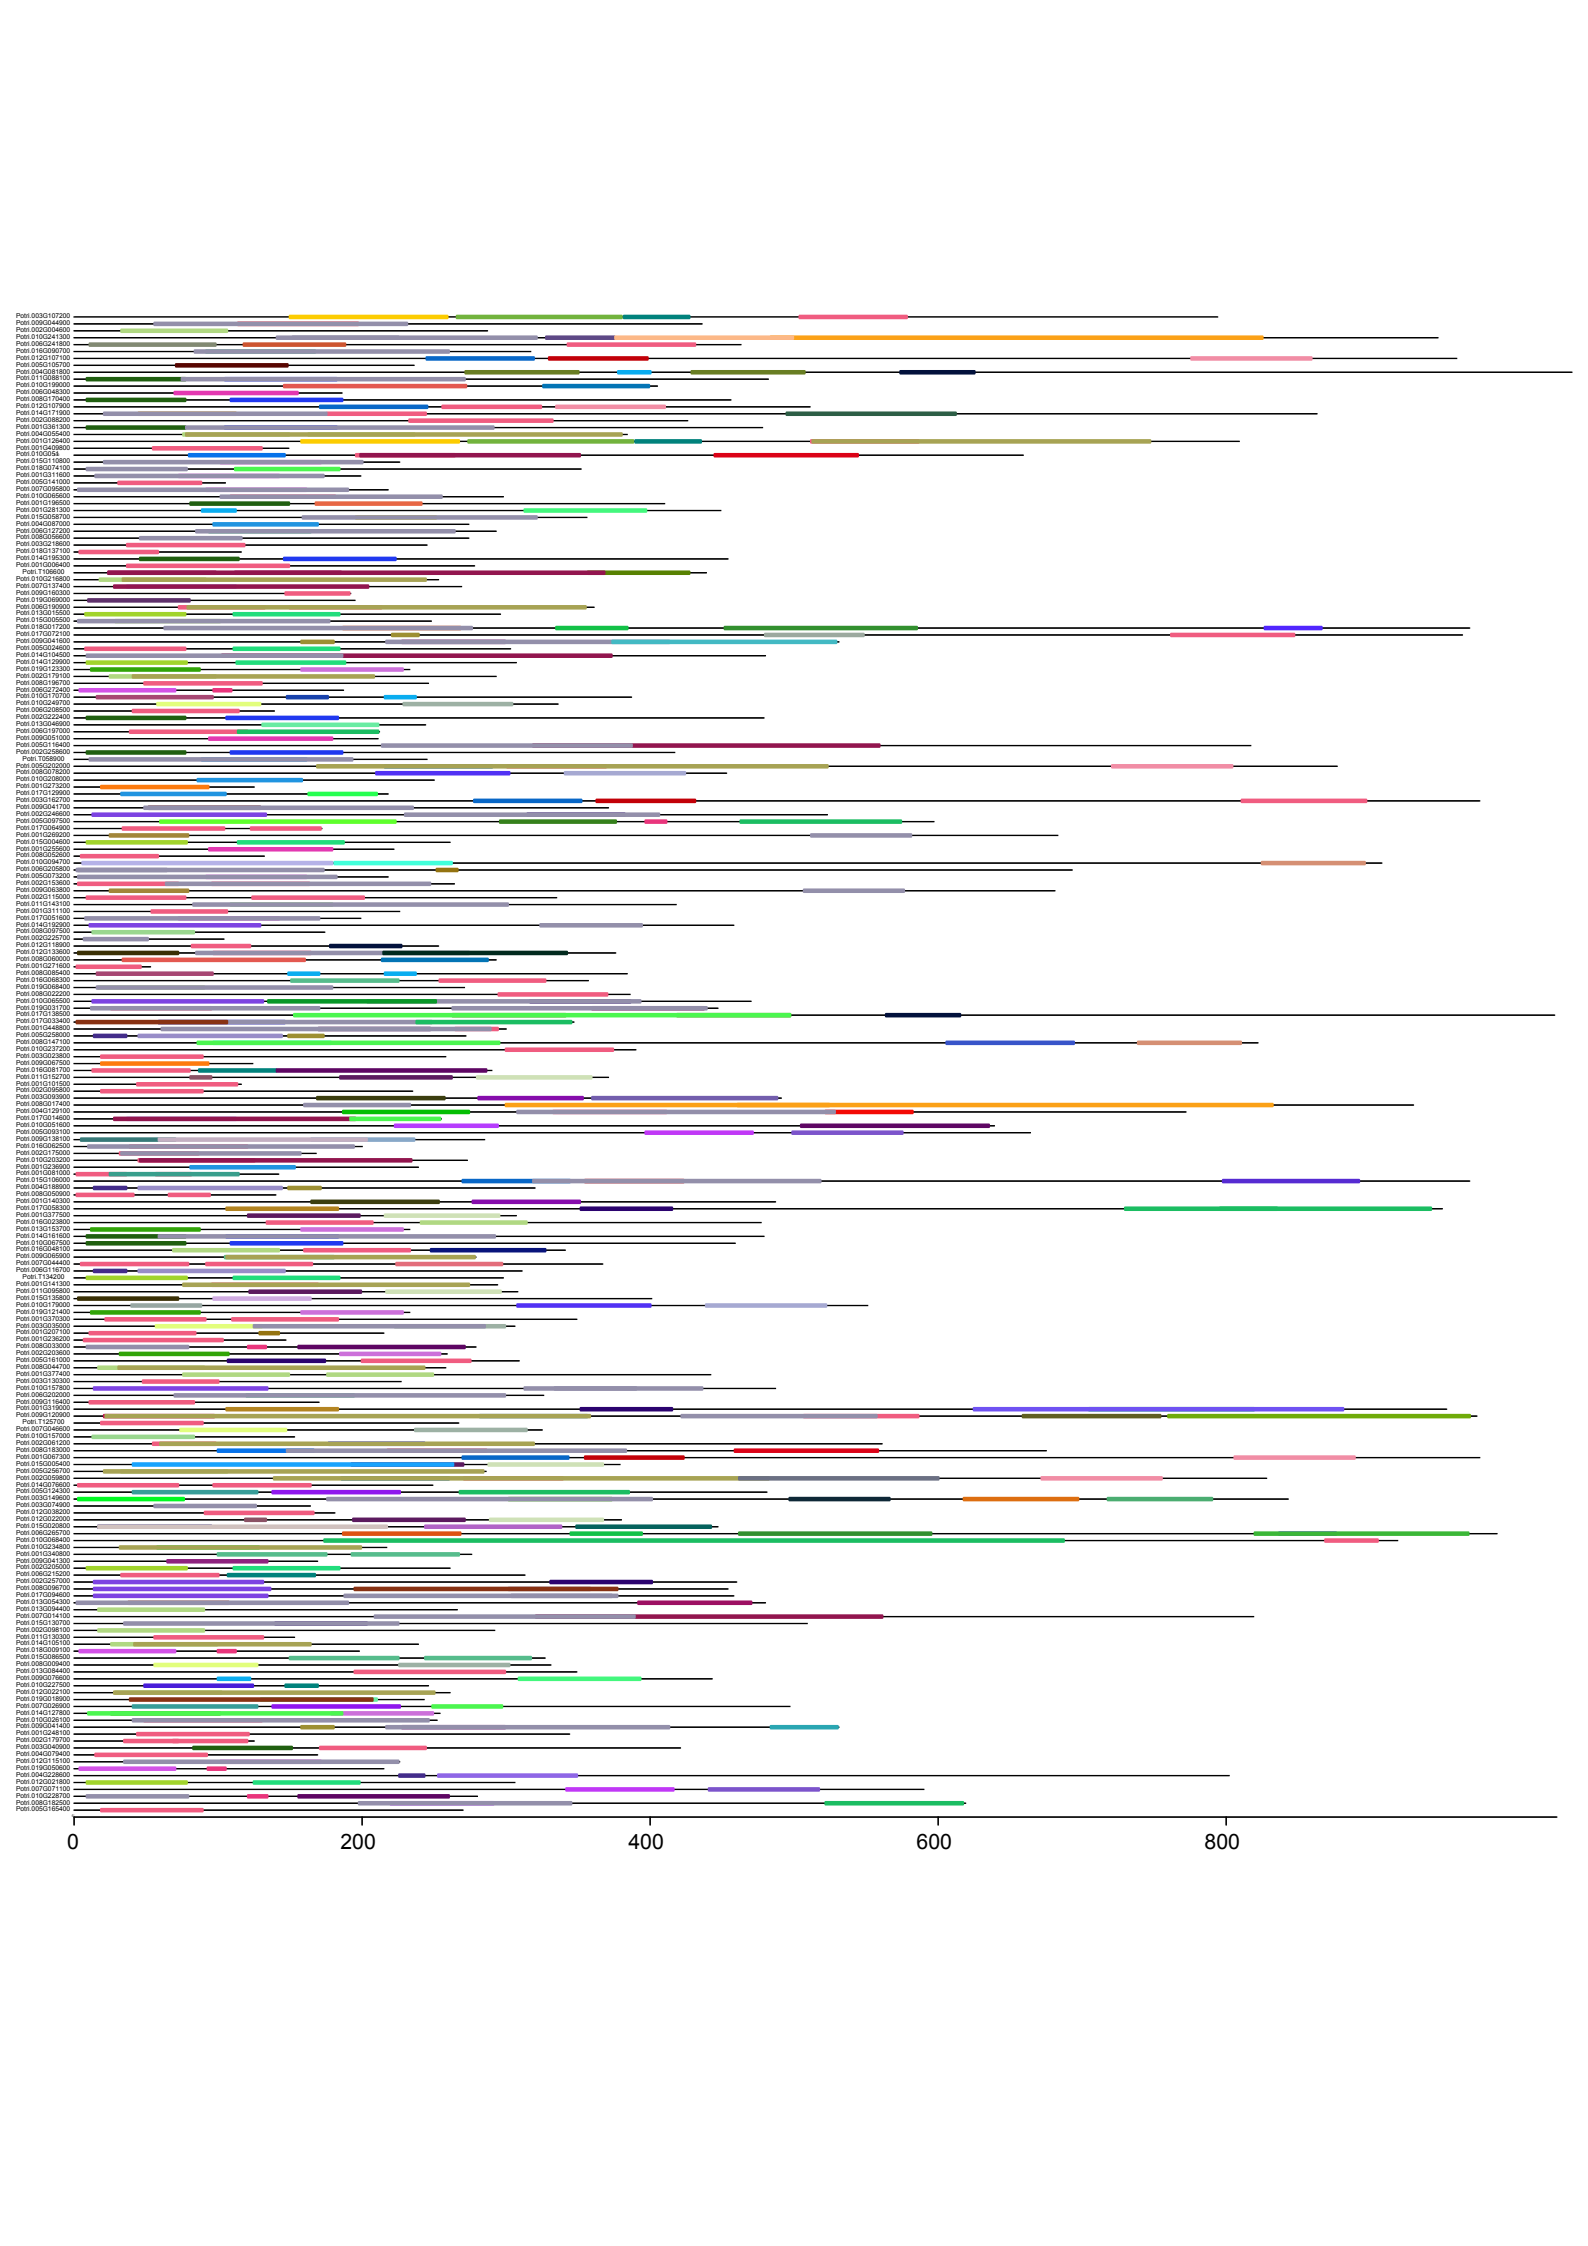

Supplement: Image_7.pdf [file Image_7.pdf]
