# Supplementary material for: PSDX: A Comprehensive Multi-Omics Association Database of Populus trichocarpa With a Focus on the Secondary Growth in Response to Stresses
Source: Front Plant Sci. 2021 May 20;12:655565. doi: 10.3389/fpls.2021.655565 (PMC8195342; doi:10.3389/fpls.2021.655565)
Supplement: Supplementary Table 3 — Values for an example of ROC analysis. [file Table_3.XLS]

## Sheet: Sheet1
Gene ID	Gene ID	MR	Predicted GO	Result label
Potri.008G069600	Potri.004G162400	top3	GO:0003674	1
Potri.008G069600	Potri.004G162400	top3	GO:0004332	1
Potri.008G069600	Potri.004G162400	top3	GO:0005975	0
Potri.008G069600	Potri.004G162400	top3	GO:0006006	0
Potri.008G069600	Potri.004G162400	top3	GO:0004332	0
Potri.004G162400	Potri.008G069600	top3	GO:0003674	1
Potri.004G162400	Potri.008G069600	top3	GO:0003824	1
Potri.004G162400	Potri.008G069600	top3	GO:0071704	0
Potri.004G162400	Potri.008G069600	top3	GO:0006629	0
